# Supplementary material
Source: Springer Nature journal article supplement (https://www.springermedizin.de/resource/supplementary/12889_2013_5669_MOESM1_ESM.pdf/9495968)
Supplement: MOESM1 [file 9495968]

IDENTIFICATION

508 records  
identified

123 duplicates  
excluded

SCREENING

385 records screened  
(322 study abstracts, 30 full  
text studies, 11 comments/  
editorials, 3 book chapters,  
10 press releases, 3  
conference schedules, 1  
guideline, 5 records  
published before 1998

353 records  
excluded

ELIGIBILITY

32 full text studies assessed  
for eligibility

21 full text studies excluded  
(acceptability rate missing  
or no HST performed, 1  
analysis of a commercial  
test manufacturer)

INCLUDED

11 studies  
included in  
review
